# Supplementary material
Source: PubMed Central journal article supplement (PMC7298705)
Supplement: mBio.00455-20-sf001.pdf [file mBio.00455-20-sf001.pdf]

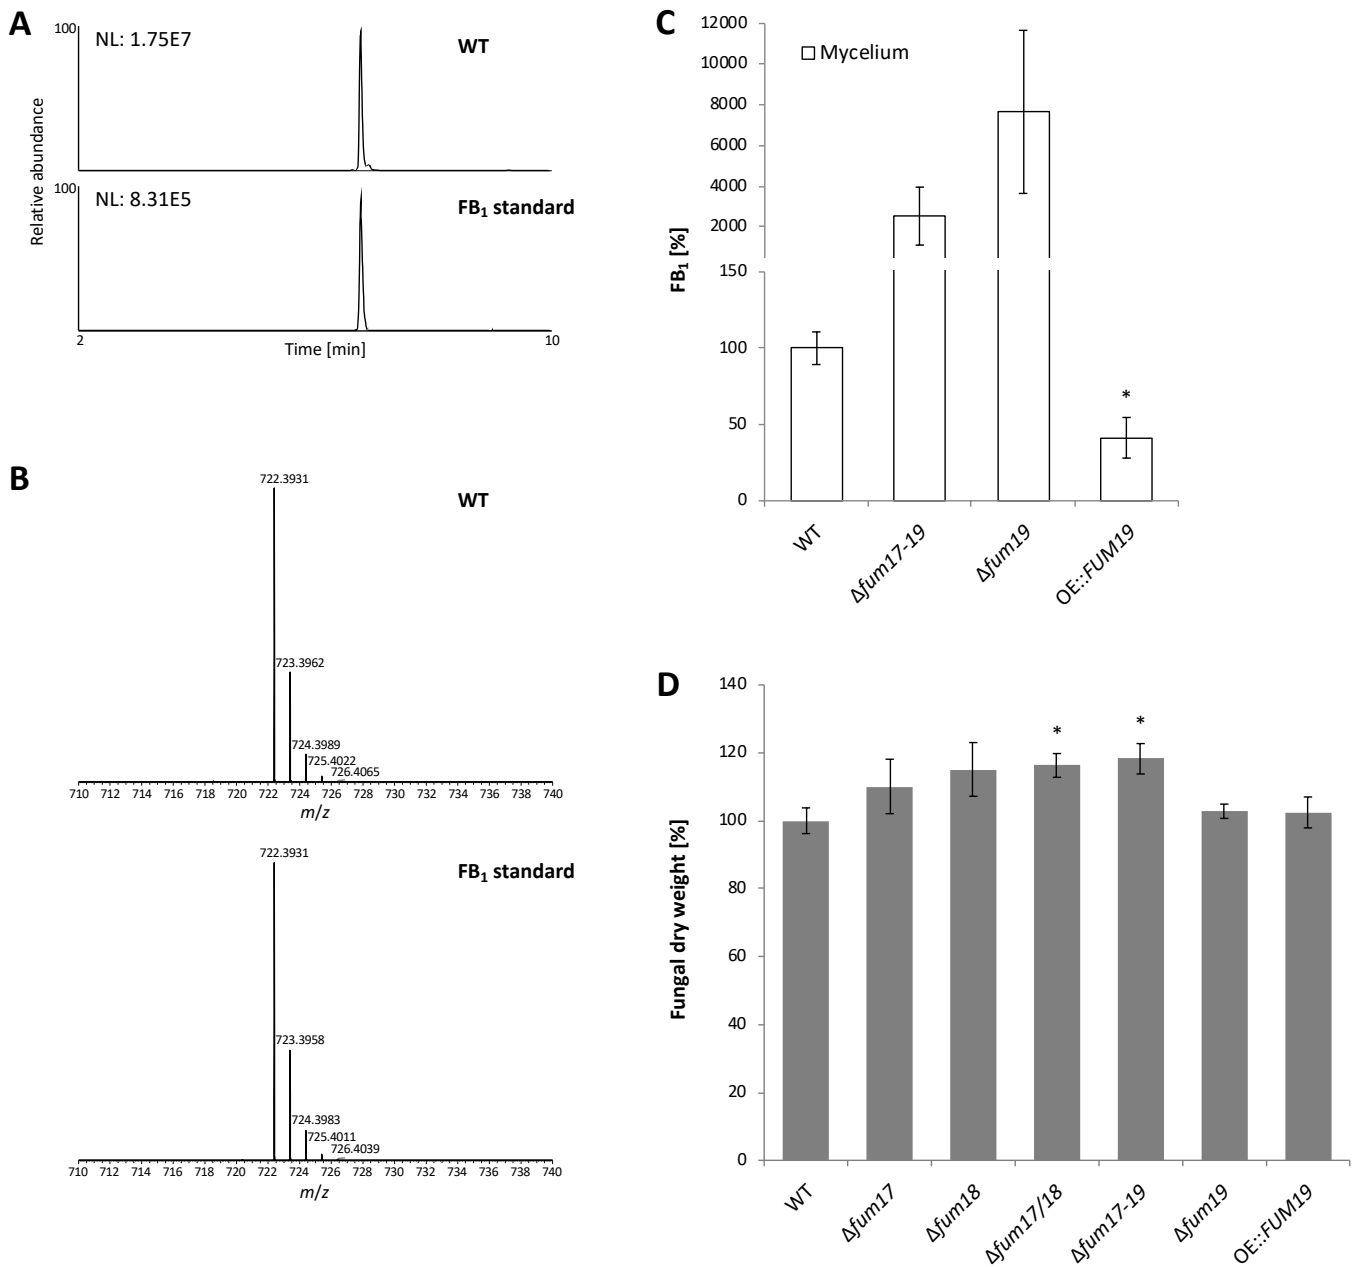

**Figure S1. Chemical analyses of FB<sub>1</sub>.** **A)** HPLC-HRMS comparison of FB<sub>1</sub> produced by the *F. verticillioides* WT with the chemical standard. Extracted ion chromatograms for  $m/z = 722.3957 \pm 5$  ppm, and **B)** measured accurate masses. **C)** Intracellular accumulation of FB<sub>1</sub> in  $\Delta$ fum17-19,  $\Delta$ fum19 and OE::FUM19 mutants. Extracts from washed mycelium were analyzed *via* HPLC-HRMS. **D)** The fungal biomass of FUM17, FUM18 and FUM19 mutants was determined after freeze-drying of the harvested mycelium. Indicated strains were grown in ICI/6 mM Gln shaking culture for 7 days. FB<sub>1</sub> production and biomass of the WT were arbitrarily set to 100%, respectively. Data are mean values  $\pm$  standard deviation ( $n = 3$ ). For statistical analysis, the mutants were compared with the WT using the student's *t*-test: \*,  $p < 0.05$ .
