# Supplementary material
Source: PubMed Central journal article supplement (PMC7298705)
Supplement: mBio.00455-20-sf003.pdf [file mBio.00455-20-sf003.pdf]

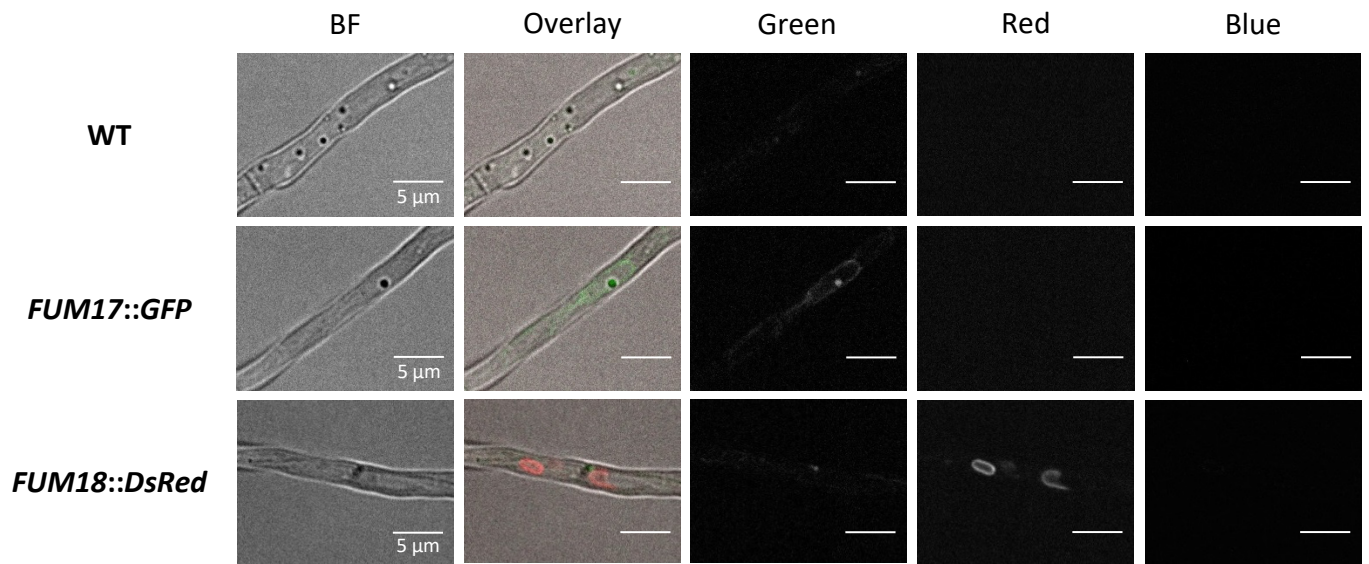

**Figure S3. Confocal microscopy for localization of Fum17-GFP and Fum18-DsRed.** Conidia were inoculated in ICI/6 mM Gln and grown as a standing culture overnight. Indicated strains were analyzed for GFP, DsRed and BFP fluorescence. Shown are individual channels in black/white, brightfield (BF) and an overlay with BF in color.
