# Supplementary material
Source: PubMed Central journal article supplement (PMC7298705)
Supplement: mBio.00455-20-sf004.pdf [file mBio.00455-20-sf004.pdf]

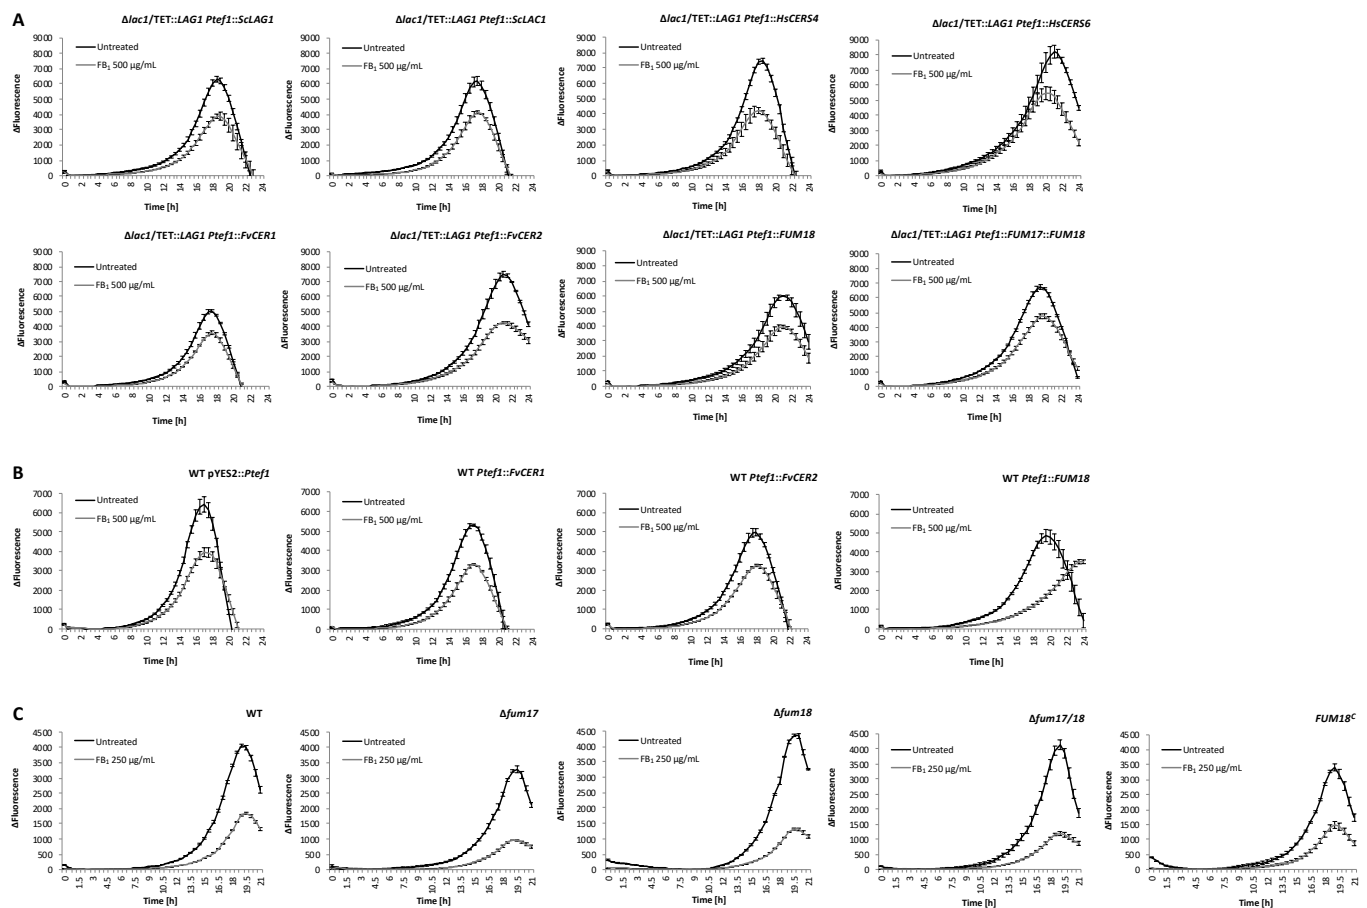

**Figure S4. Resazurin cell viability assays. A)** Plasmid-harboring *S. cerevisiae*  $\Delta lac1/TET::LAG1$  strains were grown in SD -Ura without doxycycline for 24 hours. **B)** Plasmid-harboring *S. cerevisiae* WT strains were grown in SD -Ura for 24 hours. **C)** *F. verticillioides* WT and *FUM17/18* mutants were grown in ICI/6 mM Gln for 21 hours. Fluorescence was detected every 30 min. Each strain was incubated under the addition of water (untreated) or FB<sub>1</sub> as indicated. To account for media- and compound-related variations, measurements of each sample were normalized against its lowest starting value. Data are mean values  $\pm$  standard deviation ( $n = 3$ ).
