# Supplementary material
Source: PubMed Central journal article supplement (PMC7298705)
Supplement: mBio.00455-20-sf005.pdf [file mBio.00455-20-sf005.pdf]

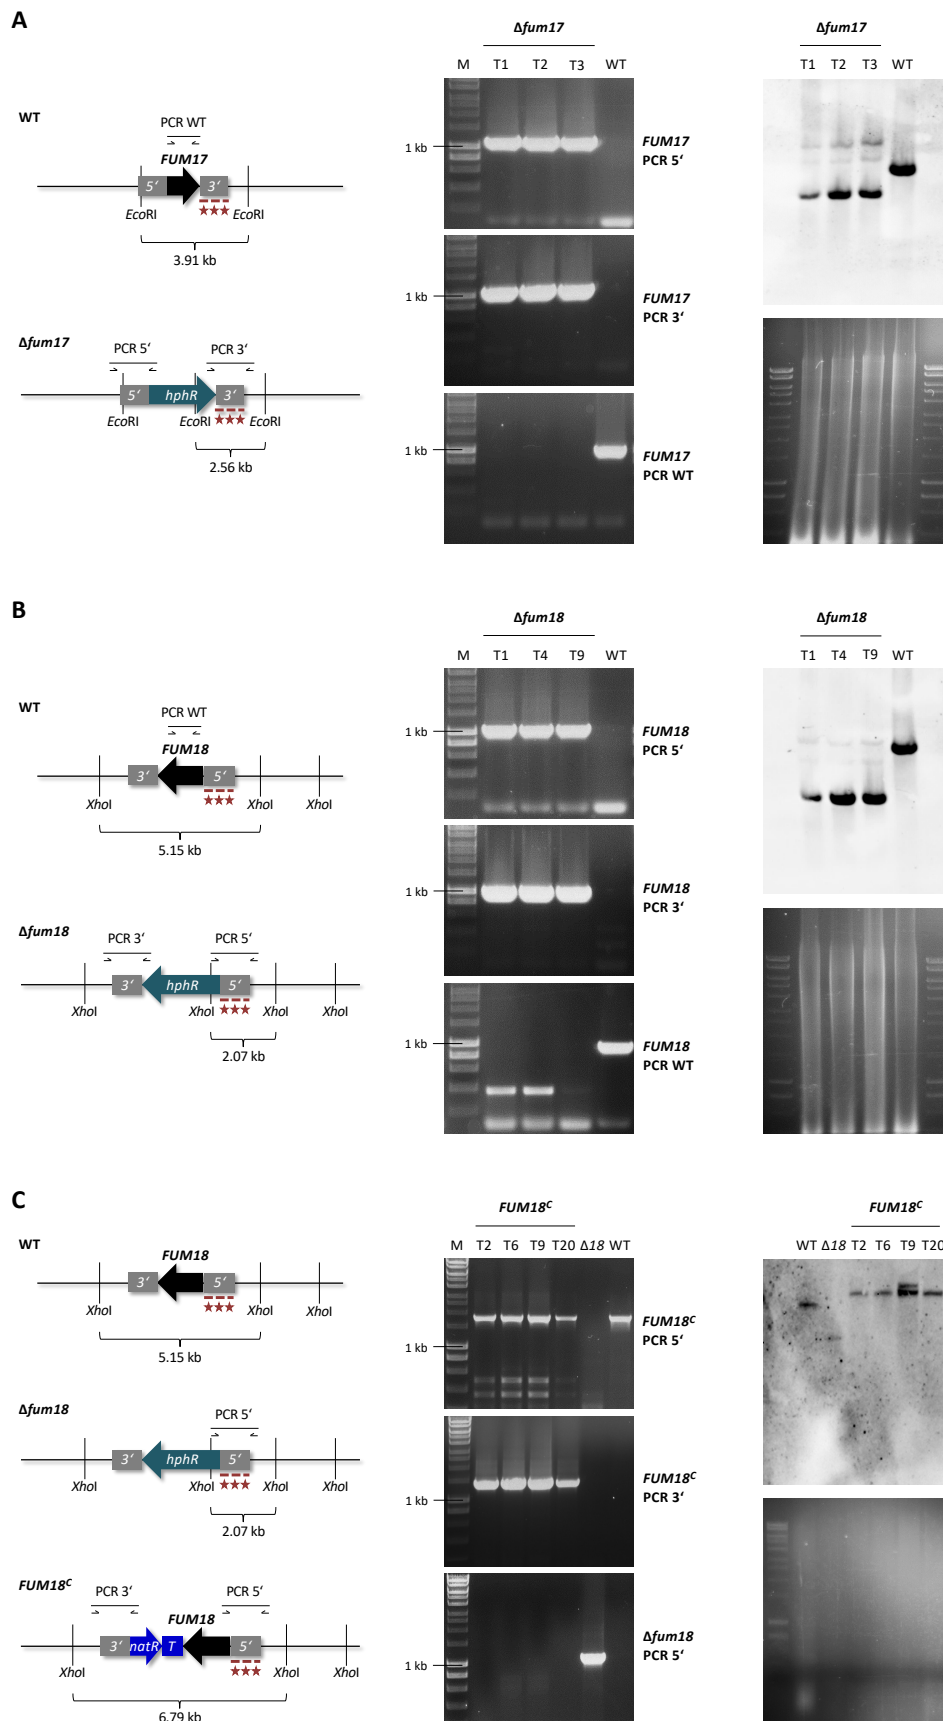

**Figure S5. Verification of *FUM17* and *FUM18* single mutants by diagnostic PCR and Southern blot.** **A)** Deletion of *FUM17* via homologous recombination with the hygromycin B resistance cassette (*hphR*). Diagnostic PCR verified the correct recombination of 5' and 3' flanks, and the absence of WT gene for three independent transformants. Genomic DNA of transformants and WT was digested with *EcoRI*, and the 3' flank was applied for probing. **B)** Deletion of *FUM18* via homologous recombination with *hphR*. Genomic DNA was digested with *XhoI*, and the 5' flank was applied for probing. **C)** Complementation of  $\Delta$ *fum18* with the full-length gene and nourseothricin resistance cassette (*natR*). Genomic DNA was digested with *XhoI*, and the 5' flank was applied for probing. *FUM18<sup>C</sup>* T9 showed an ectopic integration and was not chosen for further analyses.
