# Supplementary material
Source: PubMed Central journal article supplement (PMC7298705)
Supplement: mBio.00455-20-sf006.pdf [file mBio.00455-20-sf006.pdf]

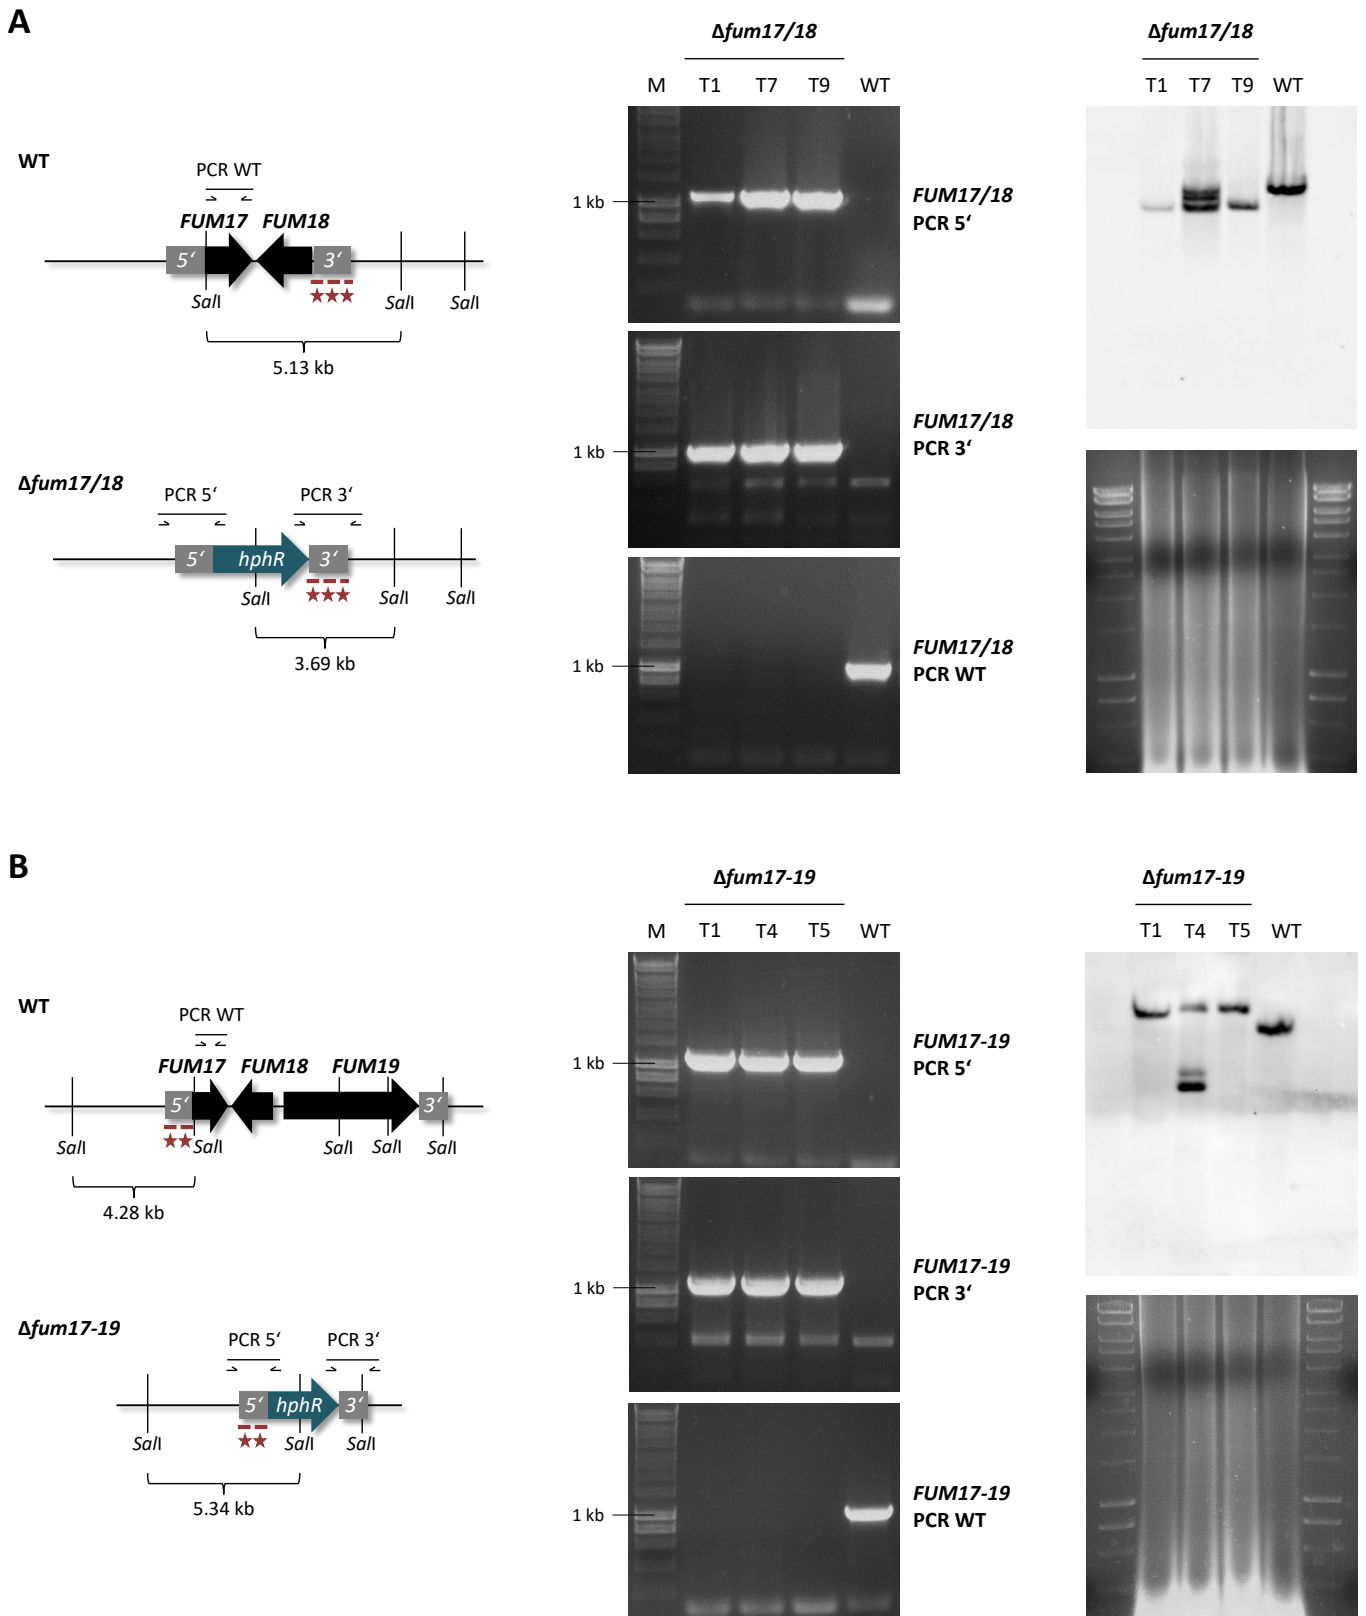

**Figure S6. Verification of  $\Delta$ fum17/18 double and  $\Delta$ fum17-19 triple mutants by diagnostic PCR and Southern blot. A)** Deletion of *FUM17/18* via homologous recombination with the hygromycin B resistance cassette (*hphR*). Diagnostic PCR verified the correct recombination of 5' and 3' flanks, and the absence of WT signal for three independent transformants. Genomic DNA of transformants and WT was digested with *Sall*, and the 3' flank was applied for probing.  $\Delta$ fum17/18 T7 showed an ectopic integration and was not chosen for further analyses. **B)** Deletion of *FUM17-19* via homologous recombination with *hphR*. Genomic DNA was digested with *Sall*, and the 5' flank was applied for probing.  $\Delta$ fum17-19 T4 showed an ectopic integration and was not chosen for further analyses.
