# Supplementary material
Source: PubMed Central journal article supplement (PMC7298705)
Supplement: mBio.00455-20-sf007.pdf [file mBio.00455-20-sf007.pdf]

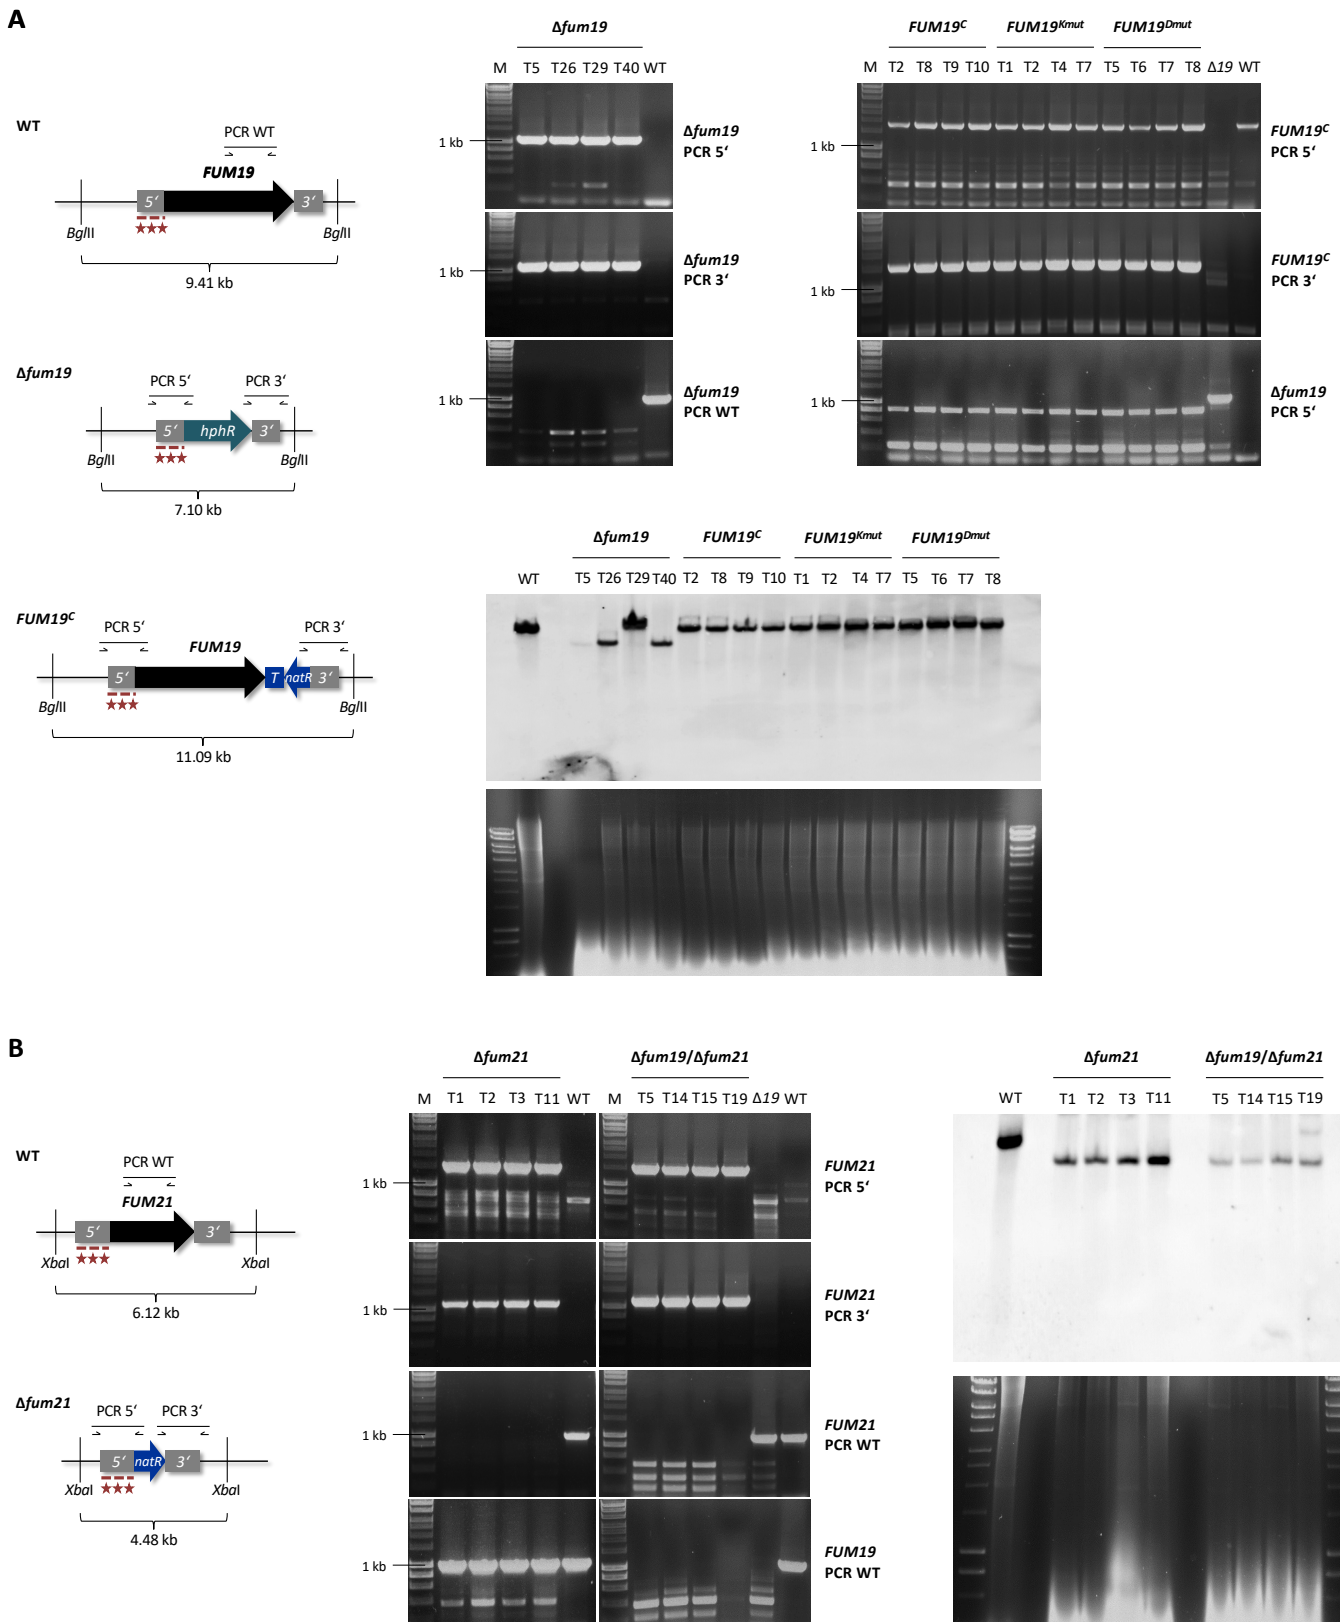

**Figure S7. Verification of *FUM19* and *FUM21* mutants by diagnostic PCR and Southern blot. A)** Deletion of *FUM19* via homologous recombination with the hygromycin B resistance cassette (*hphR*), and subsequent complementation with the full-length (point-mutated) gene and nourseothricin resistance cassette (*natR*). Diagnostic PCR verified the correct recombination of 5' and 3' flanks, and the absence of untransformed nuclei for four independent  $\Delta fum19$ , *FUM19<sup>C</sup>*, *FUM19<sup>Kmut</sup>* and *FUM19<sup>Dmut</sup>* mutants, respectively. Genomic DNA of transformants and WT was digested with *Bgl*II, and the 5' flank was applied for probing.  $\Delta fum19$  T29 showed an ectopic integration and was not chosen for further analyses. **B)** Deletion of *FUM21* in the WT and  $\Delta fum19$  backgrounds via homologous recombination with *natR*. Genomic DNA was digested with *Xba*I, and the 5' flank was applied for probing.
