# Supplementary material
Source: PubMed Central journal article supplement (PMC7298705)
Supplement: mBio.00455-20-sf008.pdf [file mBio.00455-20-sf008.pdf]

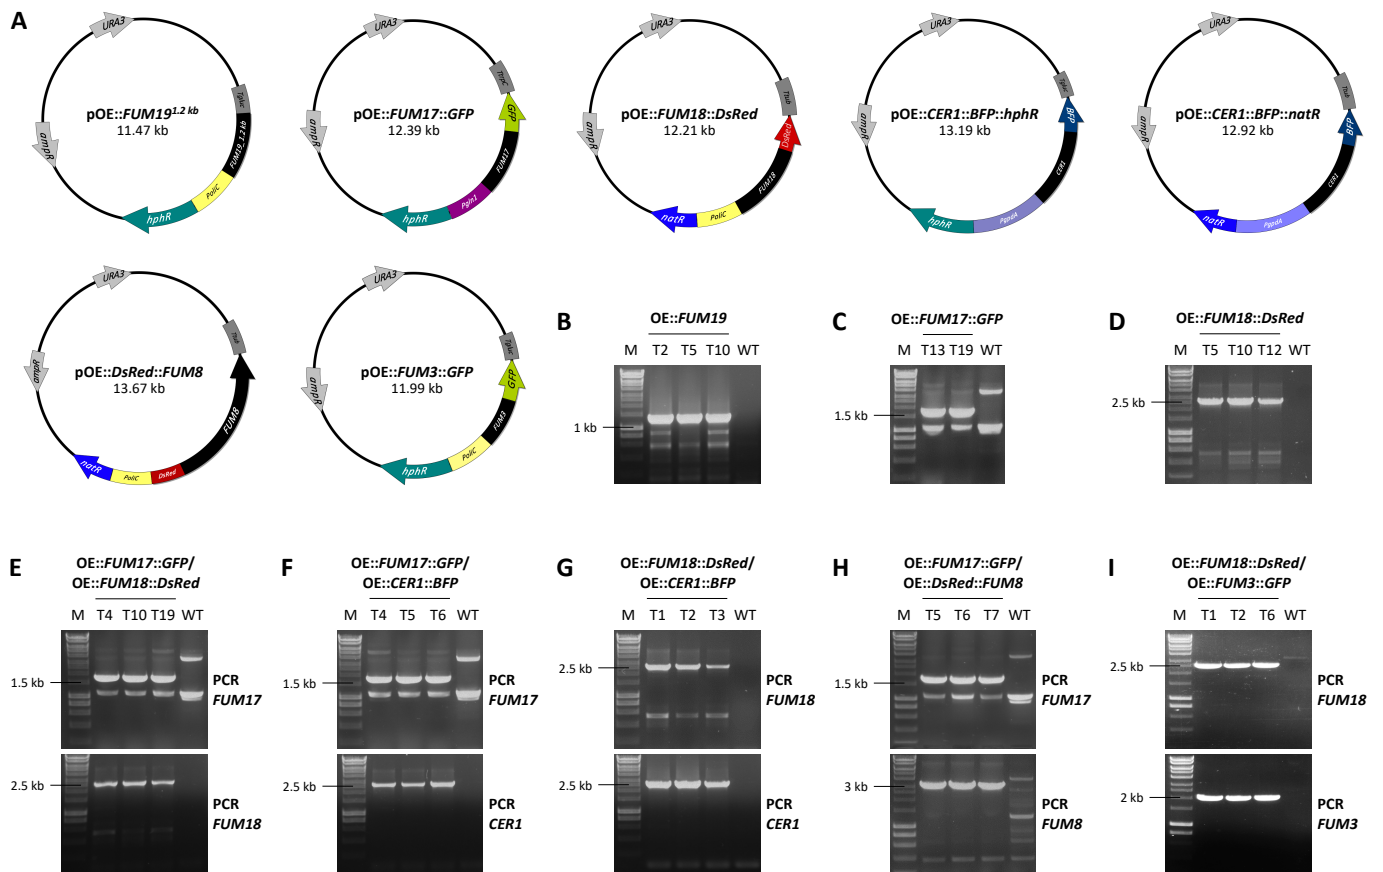

**Figure S8. Verification of *F. verticillioides* overexpression strains by diagnostic PCR. A)** Vectors for constitutive expression of the first 1.2 kb of *FUM19* (*PoliC*) as well as full-length fusion genes *FUM17::GFP* (*PglN1*), *FUM18::DsRed* (*PoliC*), *CER1::BFP* (*PgpDA*), *DsRed::FUM8* (*PoliC*) and *FUM3::GFP* (*PoliC*). **B)-I)** Diagnostic PCR verified the *in locus* integration of circular pOE::*FUM19*<sup>1.2 kb</sup>, giving full-length *FUM19*, as well as the ectopic integration of the other circular vectors, yielding indicated single and double mutants. The tested PCR signals were absent in the WT control.
