# Supplementary material
Source: PubMed Central journal article supplement (PMC7298705)
Supplement: mBio.00455-20-sf009.pdf [file mBio.00455-20-sf009.pdf]

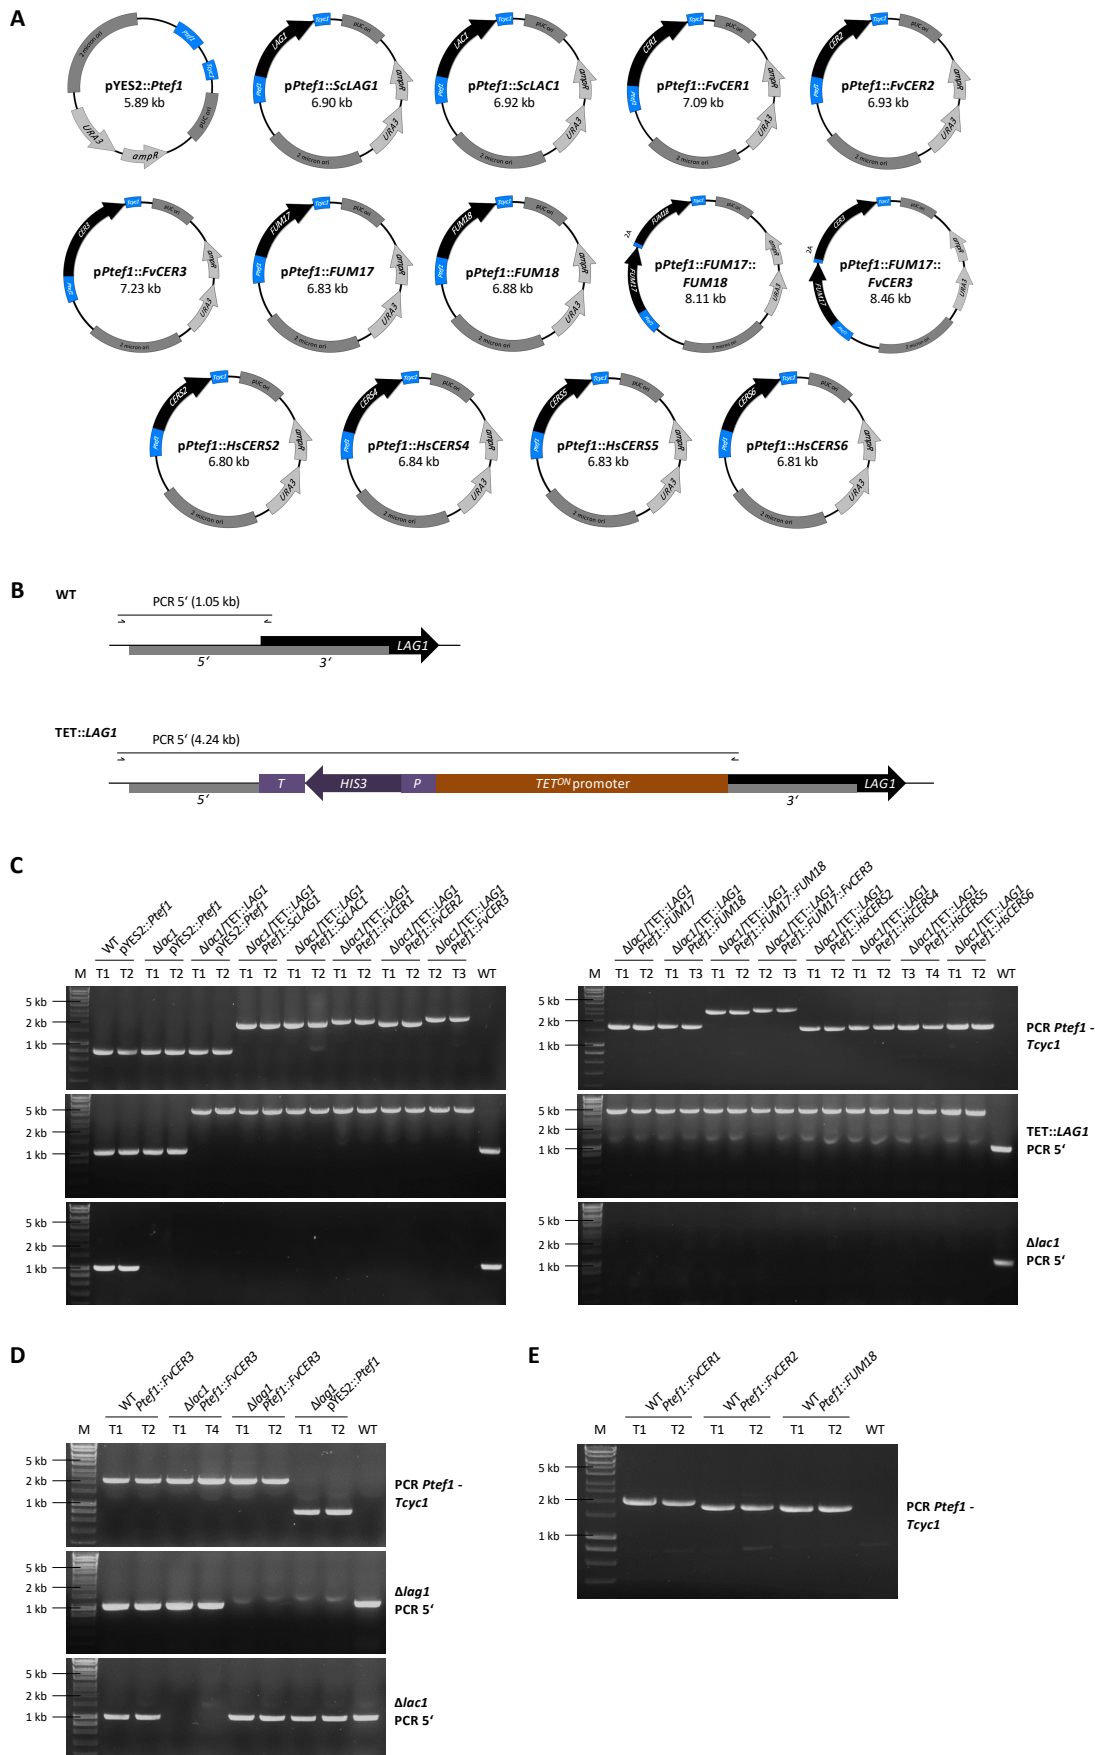

**Figure S9. Ceramide synthase complemented yeast strains. A)** *S. cerevisiae*, *F. verticillioides* and human ceramide synthase genes were expressed under control of the constitutive yeast promoter *Ptef1*. pYES2::*Ptef1* was used for cloning and served as empty vector control. **B)** Promoter exchange of *S. cerevisiae* *LAG1* using the inducible *TET<sup>ON</sup>* promoter and *HIS3* marker gene. **C)** *S. cerevisiae*  $\Delta$ *lac1*/*TET::LAG1* strains, harboring the respective *Ptef1* ceramide synthase plasmids (PCR *Ptef1*-*Tcyc1*), showed correct recombination of *TET::LAG1* 5' flank, and absence of *LAC1* WT signal (see Fig. 6A/C). **D)** *S. cerevisiae* WT,  $\Delta$ *lac1* and  $\Delta$ *lag1* harboring *Ptef1::FvCER3* (see Fig. 6B). **E)** *S. cerevisiae* WT harboring *Ptef1::FvCER1*, *Ptef1::FvCER2*, *Ptef1::FUM18* (see Fig. 6D).
