# Supplementary material
Source: PubMed Central journal article supplement (PMC7298705)
Supplement: mBio.00455-20-st001.pdf [file mBio.00455-20-st001.pdf]

**Table S1. Primers used in this study.** Introduced overhangs required for yeast recombinational cloning are underlined.

| Gene/<br>Construct                                                                          | Primer         | Sequence 5' → 3'                                           |
|---------------------------------------------------------------------------------------------|----------------|------------------------------------------------------------|
| <b><i>F. verticillioides</i> deletion mutants</b>                                           |                |                                                            |
| <b>FUM17</b>                                                                                | fum17_5F       | <u>GTAATACGACTCACTATAGGGAATATTGAGT</u> GCAATGCTTGCAGTACC   |
|                                                                                             | fum17_5R       | TAGTGCCACGTTCTAAATTC <u>AA</u> CCAAGGGGACGGAAGTTCAGTCAGTG  |
|                                                                                             | fum17_3F       | AGCACTCGTCCGAGGGCAAAGGAATAGGTAAGTGGCGATGGAATCTTTG          |
|                                                                                             | fum17_3R       | GACATAACTAATTACATGATGCGGCCCGTTGATTTGGGCTAAATCGCC           |
|                                                                                             | fum17_5diag    | CGGGTGCTCGTTCCTGAAGT                                       |
|                                                                                             | fum17_3diag    | CACACAAGACATGGGCATTGGC                                     |
|                                                                                             | fum17_F        | CAGACCCGGCCAAGGAAACAG                                      |
|                                                                                             | fum17_R        | GCTCGAAAGGACCAACGGTACG                                     |
| <b>FUM18</b>                                                                                | fum18_5F       | <u>GTAATACGACTCACTATAGGGAATATT</u> CAGACTGTACTCCACTGG      |
|                                                                                             | fum18_5R       | TAGTGCCACGTTCTAAATTC <u>AA</u> CCAAGAAAGATTAATAAACGTCAAG   |
|                                                                                             | fum18_3F       | AGCACTCGTCCGAGGGCAAAGGAATAGGATAGTGAGATATTAGAAAAC           |
|                                                                                             | fum18_3R       | GACATAACTAATTACATGATGCGGCCCGAAGAGGCTTCTGCGGCCTC            |
|                                                                                             | fum17/18_3F    | AGCACTCGTCCGAGGGCAAAGGAATAGAAAGATTAATAAACGTCAAG            |
|                                                                                             | fum17/18_3R    | GACATAACTAATTACATGATGCGGCCCGACTGTACTCCACTGG                |
|                                                                                             | fum18_5diag    | CTATATCCGAGGCGGAGCAGGC                                     |
|                                                                                             | fum18_3diag    | CGCCAATGCTCTATTTCTCGCC                                     |
|                                                                                             | fum18_F        | GGCTTCACGTTACTGGCTGGTG                                     |
|                                                                                             | fum18_R        | GATCCATGGCTCAATCAAGTGCC                                    |
| <b>FUM19</b>                                                                                | fum19_5F       | <u>GTAATACGACTCACTATAGGGAATATT</u> CTTGATTAACCCATCAATGTC   |
|                                                                                             | fum19_5R       | TAGTGCCACGTTCTAAATTC <u>AA</u> CCAAGGGCTTTAGAGTCTGTATTATAA |
|                                                                                             | fum19_3F       | AGCACTCGTCCGAGGGCAAAGGAATAGATAATATGTAGGATCGATCC            |
|                                                                                             | fum19_3R       | GACATAACTAATTACATGATGCGGCCCTAGAAATGCCCTTCGGCAC             |
|                                                                                             | fum19_5diag    | CGGCGAGCCTCAATGTTGACTG                                     |
|                                                                                             | fum19_3diag    | CCTGTGCTGTCTCGCGAGCC                                       |
|                                                                                             | fum19_F        | GGCGATCTTGCGCTTACCG                                        |
|                                                                                             | fum19_R        | GTCGACTGACCGCACCCATTG                                      |
| <b>FUM21</b>                                                                                | fum21_5F       | <u>GTAATACGACTCACTATAGGGAATATT</u> GTTTCATATCGGGACATCCAG   |
|                                                                                             | fum21_5R       | AGTGCTCCTTCAATATCATCTTCTGTCCGAAAAGTTGATGATGAAA             |
|                                                                                             | fum21_3F       | CTCTACATGAGCATGCCCTGCCCTGAATAATAAACATATCTATCC              |
|                                                                                             | fum21_3R       | GACATAACTAATTACATGATGCGGCCCGTAGGCCACTTCCAAGAGC             |
|                                                                                             | fum21_5diag    | GGTACACGTGGAAGCTGCGC                                       |
|                                                                                             | fum21_3diag    | CCACGCCAGTTCGTTTGGC                                        |
|                                                                                             | fum21_F        | GACGGAGATACAGAGCGTGGACC                                    |
|                                                                                             | fum21_R        | CTCCAAGACTAGGGCTGTCCCG                                     |
| <b>hphR</b>                                                                                 | hph_F          | CTTGGTTGAATTTAGAACGTGG                                     |
|                                                                                             | hph_R          | CTATTCCTTTGCCCTCGGACGAG                                    |
|                                                                                             | hph_5diag      | CCACGTTCTAAATTC <u>AA</u> CCAAG                            |
|                                                                                             | hph_3diag      | GCACTCGTCCGAGGGCAAAG                                       |
| <b>natR</b>                                                                                 | nat1_F         | GACAGAAGATGATATTGAAGGAGC                                   |
|                                                                                             | nat1_R         | TCAGGGGCAGGGCATGCTCA                                       |
|                                                                                             | nat1_5diag     | CTGGTGCGGTACCGTAAGCC                                       |
|                                                                                             | nat1_3diag     | CGGACGGCGAGCGGCAGGCGC                                      |
| <b><i>F. verticillioides</i> complementation, point-mutation and overexpression strains</b> |                |                                                            |
| <b>FUM18<sup>c</sup></b>                                                                    | fum18_compl_R  | <u>CACTTGT</u> TTAGAGGGCTCGTCGAAATCTACTCTTCATTGCAATGGATG   |
|                                                                                             | fum18_compl_3F | AGTGCTCCTTCAATATCATCTTCTGTCCGATAGTGAGATATTAGAAAAC          |
|                                                                                             | fum18_Seq1     | CCAAATGCCTGAGATATCTGGGC                                    |
|                                                                                             | fum18_Seq2     | CATGAGAATCCAGCCCTGTTCCG                                    |

**Table S1 (continued)**

|                                                      |                 |                                                          |
|------------------------------------------------------|-----------------|----------------------------------------------------------|
| <b>FUM19<sup>C/mut</sup></b>                         | fum19_compl_R   | <u>CACTTGTTTAGAGGGCTCGTCGAAATCTTAGACTCTTGACGCCTCC</u>    |
|                                                      | fum19_compl_3F  | <u>AGTGCTCCTTCAATATCATCTTCTGTCATAATATGTAGGATCGATCC</u>   |
|                                                      | fum19_K631V_F   | GTTGGATCAGGAGTGTGACGTTGTGC                               |
|                                                      | fum19_K631V_R   | GCACAACGTCGACACTCTGATCCAAC                               |
|                                                      | fum19_K1260V_F  | TATTCTAGTGGGGTATCTTCCATCATA                              |
|                                                      | fum19_K1260V_R  | TATGATGGAAGATACCCCACTAGAATA                              |
|                                                      | fum19_D743K_F   | CTCCTGATATTGAAAGATATTCTGAGT                              |
|                                                      | fum19_D743K_R   | ACTCAGAATATCTTTCAATATCAGGAG                              |
|                                                      | fum19_D1397K_F  | CTTCTCCTACTCAAAGAGCCTAGTTCT                              |
|                                                      | fum19_D1397K_R  | AGAACTAGGCTCTTTGAGTAGGAGAAG                              |
|                                                      | fum19_Seq1      | CTACCTTGCTCGATCATCTCGCC                                  |
|                                                      | fum19_Seq2      | CTCACGCCCTAACAGCAGCC                                     |
| <b>OE::FUM19</b>                                     | OE_fum19_F      | <u>AACTCCATCACATACAATCGATCCAAATGATGAACTTTGAAGGCTG</u>    |
|                                                      | OE_fum19_R      | <u>CCTAATCATACTTATCTACATACGCGTCTTATGGAATATTGCGC</u>      |
|                                                      | OE_fum19_diag   | <u>CGATGCTGATCTGGCGTTGC</u>                              |
| <b>OE::FUM17::GFP</b>                                | OE_fum17_F      | <u>TATCCCCGATCACAACCACATTACAATGTTCAAAGCCACGACCTC</u>     |
|                                                      | fum17_GFP_R     | <u>ATTACTTACCTCACCTTGGAAACCATGTCCCCATGCTCGATTCTG</u>     |
| <b>OE::FUM18::DsRed</b>                              | OE_fum18_F      | <u>AACTCCATCACATACAATCGATCCAAATGGCCACTACAGTTCAAAC</u>    |
|                                                      | fum18_DsRed_R   | <u>TTGATGACGTCCTCGGAGGAGGCCATCTTTCATTGCAATGGATGTTG</u>   |
| <b>OE::CER1::BFP</b>                                 | OE_cer1_F       | <u>CTACCCCGCTTGAGCAGACATACAATGTCAGGCTCAGAACCCTTTC</u>    |
|                                                      | cer1_BFP_R      | <u>ACAGCTCCTCGCCCTTGCTCACCATGTTCTTTGCATCTTCAGGGATC</u>   |
|                                                      | BFP_F           | ATGGTGAGCAAGGGCGAGGAGCTG                                 |
|                                                      | BFP_Tgluc_R     | TAATCATACTTATCTACATACGCTACTTGTACAGCTCGTCCATGC            |
|                                                      | BFP_Ttub_R      | GCAAAGTAGGAATGACATCAGATATCTACTTGTACAGCTCGTCCATGC         |
| <b>OE::DsRed::FUM8</b>                               | fum8_DsRed_F    | <u>CGCCACCACCTGTTCTGGCGGCCGCTATGTCCACCCAGGAAATCAC</u>    |
|                                                      | fum8_Ttub_R     | <u>AAGCAAAGTAGGAATGACATCAGATATTCAACATGTCCCTCGCGATAA</u>  |
|                                                      | fum8_Seq_F      | GAGGAACTGGCCACATACTTGGG                                  |
|                                                      | fum8_Seq_R      | GGTTGGCGCATGCACTGAGC                                     |
| <b>OE::FUM3::GFP</b>                                 | OE_fum3_F       | <u>AACTCCATCACATACAATCGATCCAAATGAACAAGGAAAAGTTCCC</u>    |
|                                                      | fum3_GFP_R      | <u>ATTACTTACCTCACCTTGGAAACCATATCATCTAACCCAAGATGTAAAG</u> |
| <b>natR</b>                                          | nat1_TtrpC_R    | GATTCGACGAGCCCTCTAAAC                                    |
| <b>PoliC</b>                                         | PoliC_Seq_F2    | GGGAGACGTATTTAGGTGCTAGGG                                 |
| <b>PglN1</b>                                         | PglN1_Seq_F     | ATGTCGAAGTATCTTCCCTGTGC                                  |
| <b>PgpdA</b>                                         | PgpdA_F         | <u>GCCCAAAAAATGCTCCTTCAATATCCTTGGTTGAATTTAGAACGTGG</u>   |
|                                                      | PgpdA_R         | TGTGATGTCTGCTCAAGCGGGG                                   |
|                                                      | PgpdA_Seq_F     | CCCATCCAAGAACCTTTATTTCCC                                 |
| <b>Tgluc</b>                                         | Tgluc_Seq_R2    | CCGCCCTCTTTGTCTTCCGC                                     |
| <b>Ttub</b>                                          | Ttub_Seq_R2     | GGGTATCGACGATGTGTAGTCG                                   |
| <b>GFP</b>                                           | GFP_Seq_R       | CGTCTCCCTCACCTCTCCGC                                     |
| <b>Ceramide synthase yeast complementation assay</b> |                 |                                                          |
| <b>TET::LAG1</b>                                     | his3_Prom_TET_F | <u>TTTCCGGTTTCATACACCGGGCAAAGAAACACAGTCCTTTCCCGCAA</u>   |
|                                                      | his3_Term_R     | AATATGAAATGCTTTTCTTG                                     |
|                                                      | TET_F           | TCTTTGCCCGGTGTATGAAACC                                   |
|                                                      | TET_R           | TGTGATGTGATGGAGTTGAGATGGA                                |
|                                                      | lag1_5F         | <u>GTAATACGACTCACTATAGGGAATATCCTGTTGTTCTAGCCTCTTC</u>    |
|                                                      | lag1_5R         | <u>AGAACAACAAGAAAAGCATTTTCATATTGTTGTCGTTATTTCTTCAGTT</u> |
|                                                      | lag1_3F         | <u>CTCAACTCCATCACATACAATGACATCAGCTACGGACAA</u>           |
|                                                      | lag1_3R         | <u>GACATAACTAATTACATGATGCGGCCCGATAGTTAATGTCTTAGAC</u>    |
|                                                      | lag1_5diag      | TCCTGTCTTAAGCGGGAACCAC                                   |
|                                                      | lag1_diag_R     | CCCACGGAAGAGTTTCGTCTTC                                   |
|                                                      | lag1_3diag      | ACGAACAAGCCGAACACAAAGG                                   |
| <b>Ptef1::ScLAG1</b>                                 | lag1_Tef1_F     | <u>CAATCTAATCTAAGTTTTAATTACAAAATGACATCAGCTACGGACAA</u>   |
|                                                      | lag1_Cyc1T_R    | <u>GTGACATAACTAATTACATGATGTTTAAACTTATTCACACTTTCTTAG</u>  |

**Table S1 (continued)**

|                                   |                 |                                                                        |
|-----------------------------------|-----------------|------------------------------------------------------------------------|
| <i>Ptef1::ScLAC1</i>              | lac1_Tef1_F     | <u>CAATCTAATCTAAGTTTTAATTACAAAATGTCGACAATAAAGCCAAG</u>                 |
|                                   | lac1_Cyc1T_R    | <u>GTGACATAACTAATTACATGATGTTTAAACTCAAATATCCTTTTTCGTTG</u>              |
| <i>Ptef1::FvCER1</i>              | cer1_Tef1_F     | <u>CAATCTAATCTAAGTTTTAATTACAAAATGTCAGGCTCAGAACCCTTTC</u>               |
|                                   | cer1_Cyc1T_R    | <u>GTGACATAACTAATTACATGATGTTTAAACCTAGTCTTTGCATCTTCAG</u>               |
| <i>Ptef1::FvCER2</i>              | cer2_Tef1_F     | <u>CAATCTAATCTAAGTTTTAATTACAAAATGGCAGCAAAACTACGCTC</u>                 |
|                                   | cer2_Cyc1T_R    | <u>GTGACATAACTAATTACATGATGTTTAAACTTATCGTGATATCCTCTGTT</u>              |
| <i>Ptef1::FvCER3</i>              | cer3_Tef1_F     | <u>CAATCTAATCTAAGTTTTAATTACAAAATGAGCGACCATCCAGTCATG</u>                |
|                                   | cer3_Cyc1T_R    | <u>GTGACATAACTAATTACATGATGTTTAAACCTAGTCGACCTGCTTCTCGC</u>              |
| <i>Ptef1::FUM17</i>               | fum17_Tef1_F    | <u>CAATCTAATCTAAGTTTTAATTACAAAATGTTCAAAGCCACGACCTC</u>                 |
|                                   | fum17_Cyc1T_R   | <u>GTGACATAACTAATTACATGATGTTTAAACTTAGTCCCATGCTCGATT</u>                |
| <i>Ptef1::FUM18</i>               | fum18_Tef1_F    | <u>CAATCTAATCTAAGTTTTAATTACAAAATGGCCACTACAGTTCAAAC</u>                 |
|                                   | fum18_Cyc1T_R   | <u>GTGACATAACTAATTACATGATGTTTAAACTCACTCTTCATTGCAATGGA</u>              |
| <i>Ptef1::FUM17::FUM18/FvCER3</i> | fum17_2A_R      | <u>GAAGTTGGTGGCGCCAGAGCCGTCCCATGCTCGATTCTG</u>                         |
|                                   | fum18_2A_F      | <u>GACGTTGAAGAAAACCTGGCCCTATGGCCACTACAGTTCAAAC</u>                     |
|                                   | cer3_2A_F       | <u>GACGTTGAAGAAAACCTGGCCCTATGAGCGACCATCCAGTCATG</u>                    |
| <i>Ptef1::HsCERS2</i>             | HsCERS2_Tef1_F  | <u>CAATCTAATCTAAGTTTTAATTACAAAATGCTCCAGACCTTGTATGA</u>                 |
|                                   | HsCERS2_Cyc1T_R | <u>TAAGCGTGACATAACTAATTACATGATTCAGTCATTCTTACGATGGT</u>                 |
| <i>Ptef1::HsCERS4</i>             | HsCERS4_Tef1_F  | <u>CAATCTAATCTAAGTTTTAATTACAAAATGCTGTCCAGTTTCAACGA</u>                 |
|                                   | HsCERS4_Cyc1T_R | <u>TAAGCGTGACATAACTAATTACATGATCTATGTGGCTGTTGTGTGCC</u>                 |
| <i>Ptef1::HsCERS5</i>             | HsCERS5_Tef1_F  | <u>CAATCTAATCTAAGTTTTAATTACAAAATGGCGACAGCAGCGCAGGG</u>                 |
|                                   | HsCERS5_Cyc1T_R | <u>TAAGCGTGACATAACTAATTACATGATTTACTCTTCAGCCCAGTAGC</u>                 |
| <i>Ptef1::HsCERS6</i>             | HsCERS6_Tef1_F  | <u>CAATCTAATCTAAGTTTTAATTACAAAATGGCAGGGATCTTAGCCTG</u>                 |
|                                   | HsCERS6_Cyc1T_R | <u>TAAGCGTGACATAACTAATTACATGATTTAATCATCCATGGAGCAGG</u>                 |
| <b>2A sequence</b>                | 2A_F            | GGCTCTGGCGCCACCAACTTCTCTCTCCTCAAACAGGCTGGCGACGTTGA<br>AGAAAACCTGGCCCT  |
|                                   | 2A_R            | AGGGCCAGGGTTTTCTTCAACGTCGCCAGCCTGTTTGAGGAGAGAGAAG<br>TTGGTGGCGCCAGAGCC |
| <i>Ptef1</i>                      | Ptef1_diag      | GCTACAGGGCGCGTGGGGATGATCCACTAGTCAAATGTTTCTACTCCTT                      |
| <i>Cyc1T</i>                      | pYes2_Rev       | CTTCAGGTTGTCTAACTCCTTCC                                                |
| <b>qRT-PCR</b>                    |                 |                                                                        |
| <i>GMT (FVEG_09003)</i>           | GMT_qRT_F       | CCTGGTGCATCCGAGTCACCTC                                                 |
|                                   | GMT_qRT_R       | CAACGGTAACGGGAGCAGCG                                                   |
| <i>ACT (FVEG_02524)</i>           | act_qRT_F       | CGCCGCGCTCACACTCTCC                                                    |
|                                   | act_qRT_R       | GGGCTGCAGCAAGACCTCGG                                                   |
| <i>UBI (FVEG_11477)</i>           | ubi_qRT_F       | CCAGTGGAGTCCTGCGTTGACC                                                 |
|                                   | ubi_qRT_R       | GGCAATCTCGGGCACAAGAGG                                                  |
| <i>FUM8</i>                       | fum8_qRT_F      | GCGCTTGAGAGACGACTGGCC                                                  |
|                                   | fum8_qRT_R      | GGTTGGCGCATGCACTGAGC                                                   |
| <i>FUM17</i>                      | fum17_qRT_F     | CCTTAGCCACCGCCTCCAGAC                                                  |
|                                   | fum17_qRT_R     | GCTCGAAAGGACCAACGGTACG                                                 |
| <i>FUM18</i>                      | fum18_qRT_F     | CGCCATTGGTGTCTTGGATGG                                                  |
|                                   | fum18_qRT_R     | GAGATTGCTGCCAGCCAGAACC                                                 |
| <i>FUM19</i>                      | fum19_qRT_F     | CACAGCGTAGGGCAGGTTAGCG                                                 |
|                                   | fum19_qRT_R     | TCCAGAAGCTGAGCTGGATGGC                                                 |
| <i>FUM21</i>                      | fum21_qRT_F     | CGGCGTCAACGTGTGCAGAG                                                   |
|                                   | fum21_qRT_R     | CTCAATCGGACACCTGCACC                                                   |
