# Supplementary material
Source: PubMed Central journal article supplement (PMC7298705)

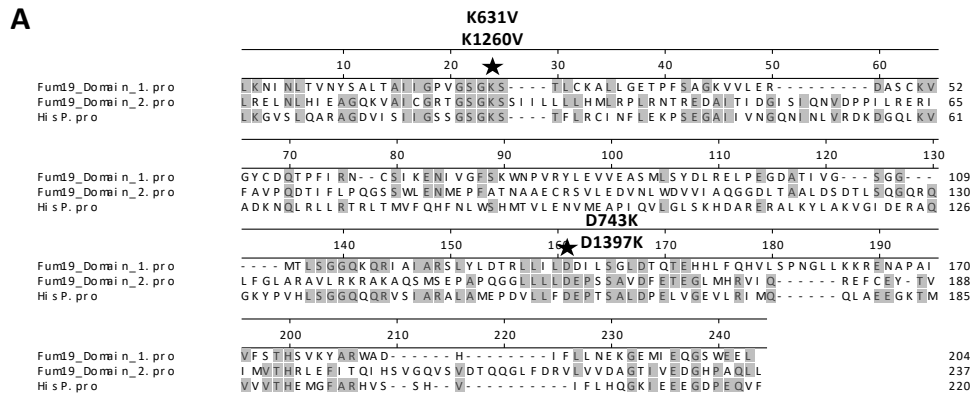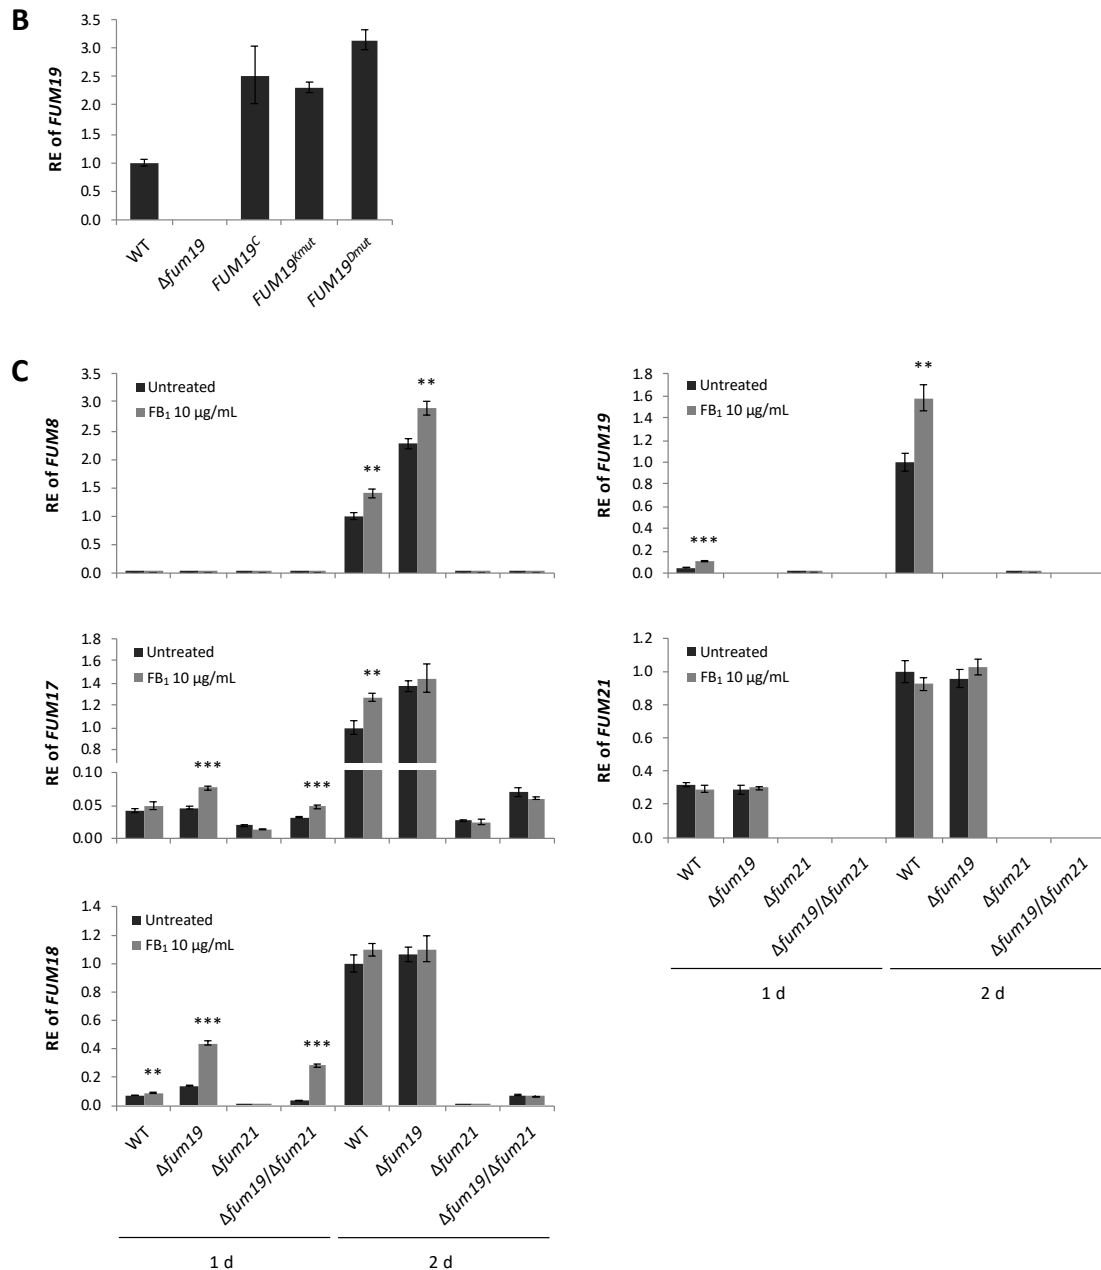

Supplement: mBio.00455-20-sf002.pdf [file mBio.00455-20-sf002.pdf]
